# Supplementary material for: Host lifestyle affects human microbiota on daily timescales
Source: PubMed Central journal article supplement (PMC4405912; doi:10.1186/gb-2014-15-7-r89), 2014-07-25

**A**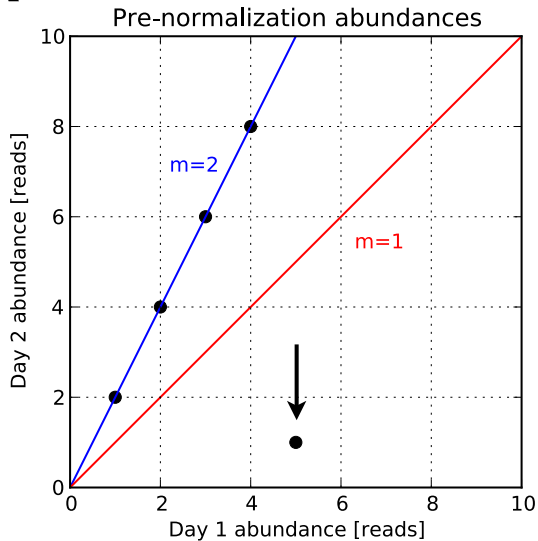**B**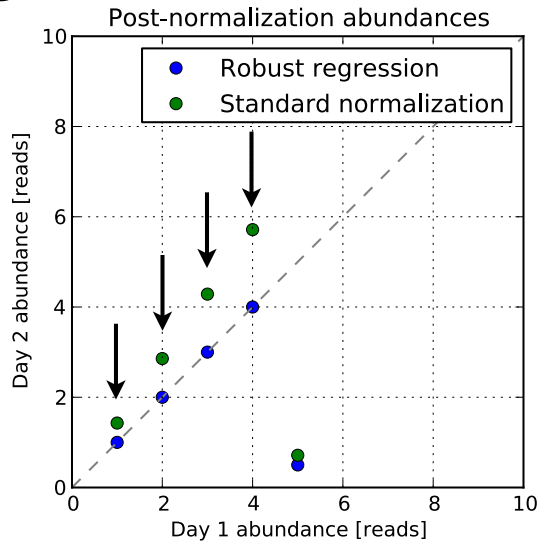

Supplement: 13059_2013_3286_MOESM5_ESM.pdf [file 13059_2013_3286_MOESM5_ESM.pdf]
