# Supplementary material for: Host lifestyle affects human microbiota on daily timescales
Source: PubMed Central journal article supplement (PMC4405912; doi:10.1186/gb-2014-15-7-r89), 2014-07-25

Subject A Gut  
(Days 40-153)

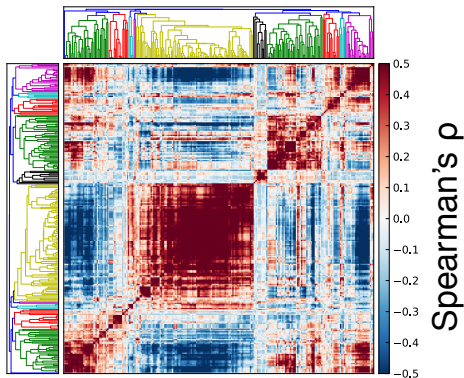

Subject B Gut  
(Days 121-197)

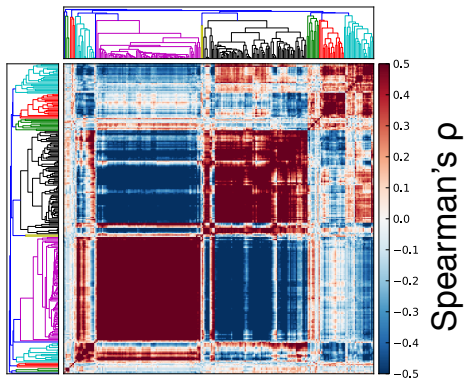

Supplement: 13059_2013_3286_MOESM8_ESM.pdf [file 13059_2013_3286_MOESM8_ESM.pdf]
