# Supplementary material for: Host lifestyle affects human microbiota on daily timescales
Source: Springer Nature journal article supplement (doi:10.1186/gb-2014-15-7-r89), 2014-07-25

Normalize each  
sample's total  
reads

Filter out low  
abundance  
OTUs

Eliminate OTU  
autocorrelations

Cluster OTUs

Correlate OTU  
clusters with  
metadata

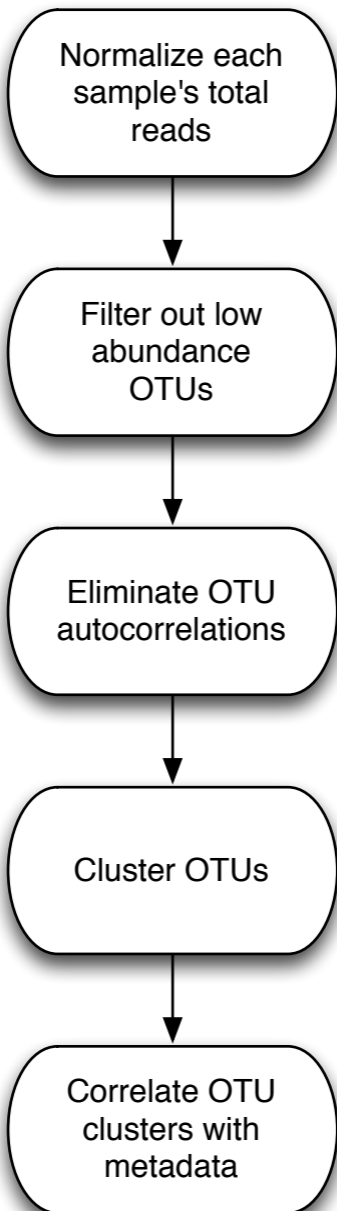

Supplement: 13059_2013_3286_MOESM13_ESM.pdf [file 13059_2013_3286_MOESM13_ESM.pdf]
