# Supplementary material for: Host lifestyle affects human microbiota on daily timescales
Source: Springer Nature journal article supplement (doi:10.1186/gb-2014-15-7-r89), 2014-07-25

**A**

Simulation 1

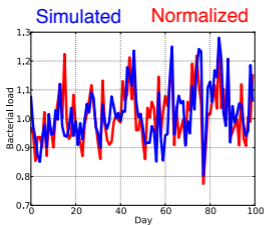

Simulation 2

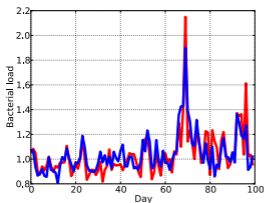

Simulation 3

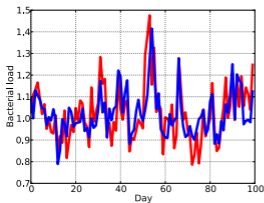

Simulation 4

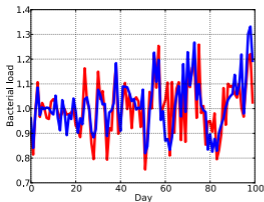**B**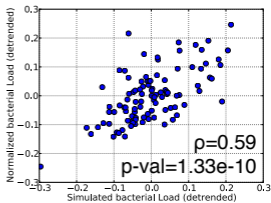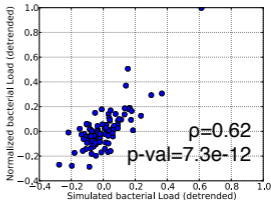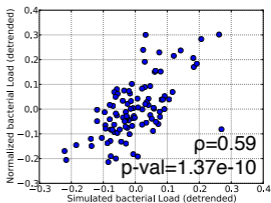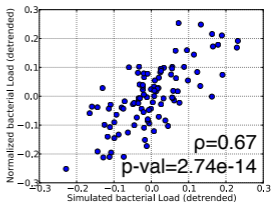

Supplement: 13059_2013_3286_MOESM15_ESM.pdf [file 13059_2013_3286_MOESM15_ESM.pdf]
