# Supplementary material for: Host lifestyle affects human microbiota on daily timescales
Source: Springer Nature journal article supplement (doi:10.1186/gb-2014-15-7-r89), 2014-07-25

Subject A  
Gut

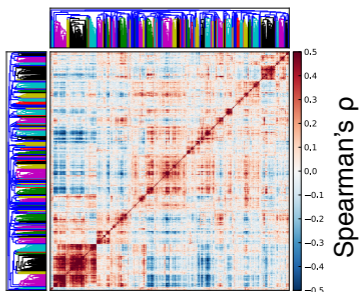

Subject B  
Gut

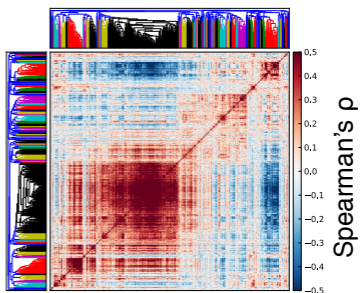

Subject A  
Saliva

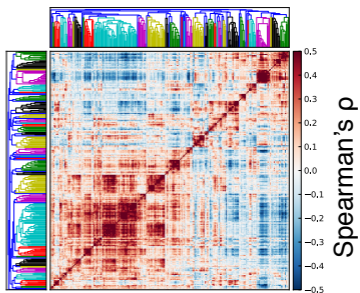

Supplement: 13059_2013_3286_MOESM16_ESM.pdf [file 13059_2013_3286_MOESM16_ESM.pdf]
