# Supplementary material for: Host lifestyle affects human microbiota on daily timescales
Source: Springer Nature journal article supplement (doi:10.1186/gb-2014-15-7-r89), 2014-07-25

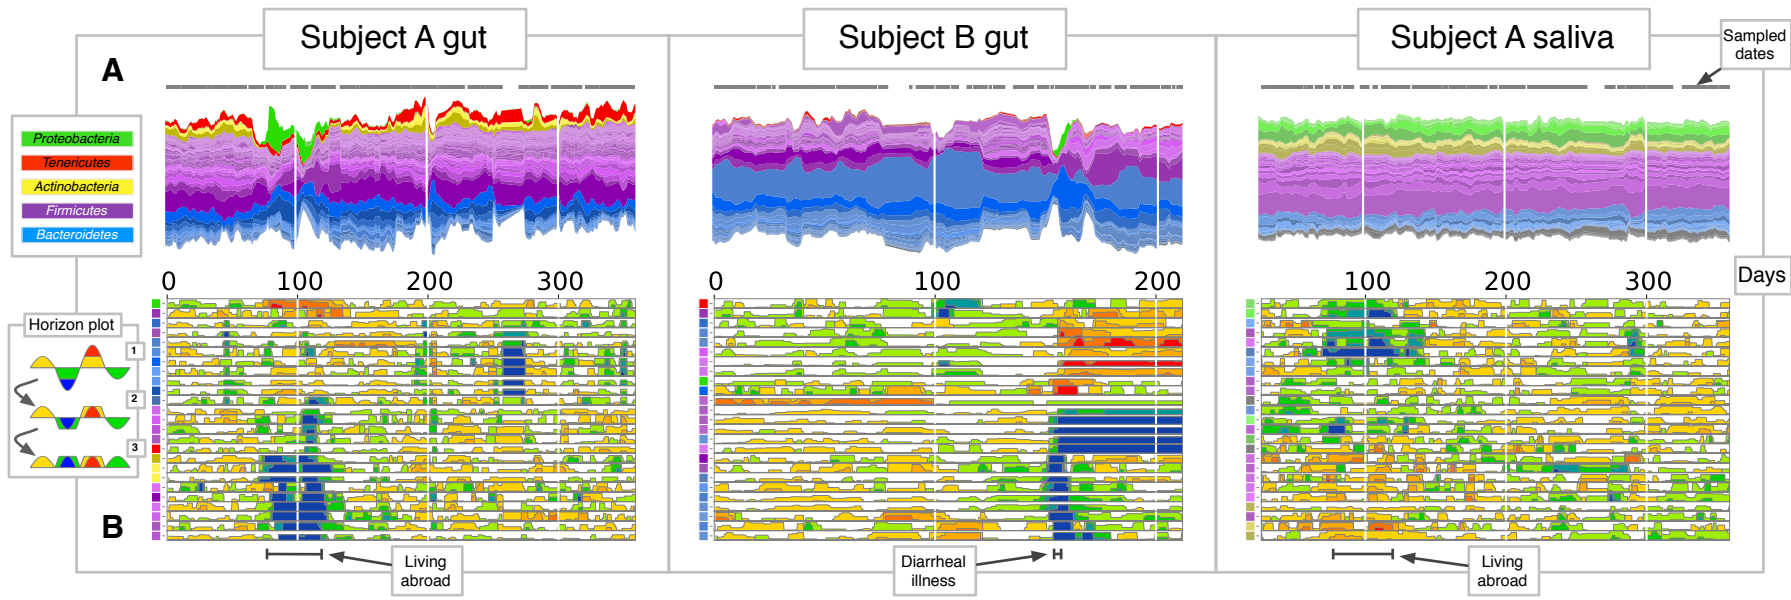

Supplement: 13059_2013_3286_MOESM19_ESM.pdf [file 13059_2013_3286_MOESM19_ESM.pdf]
