# Supplementary material for: Host lifestyle affects human microbiota on daily timescales
Source: Springer Nature journal article supplement (doi:10.1186/gb-2014-15-7-r89), 2014-07-25
Supplement: 13059_2013_3286_MOESM21_ESM.pdf [file 13059_2013_3286_MOESM21_ESM.pdf]

# Subject A

## A

Abundance by phylum (%)

|    |      |      |      |      |
|----|------|------|------|------|
| 0  | 0.0  | 68.4 | 22.6 | 6.8  |
| 1  | 0.1  | 0.0  | 93.1 | 6.8  |
| 5  | 10.0 | 0.0  | 81.4 | 0.0  |
| 7  | 0.0  | 85.8 | 14.2 | 0.0  |
| 10 | 0.0  | 0.0  | 14.5 | 85.5 |

| Cluster | Actinobacteria | Bacteroidetes | Firmicutes | Proteobacteria |
|---------|----------------|---------------|------------|----------------|
| 3       | 0.0            | 96.8          | 0.5        | 0.0            |
| 4       | 1.0            | 7.0           | 91.2       | 0.0            |
| 7       | 0.2            | 31.5          | 66.1       | 0.0            |
| 9       | 0.0            | 87.8          | 7.3        | 4.9            |
| 10      | 0.1            | 0.4           | 16.1       | 83.4           |

## E

## B

Cluster abundances

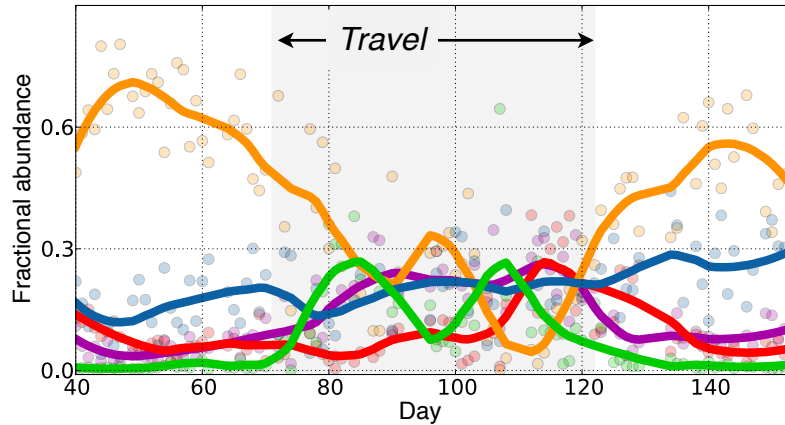

## C

Log10 OTU abundance

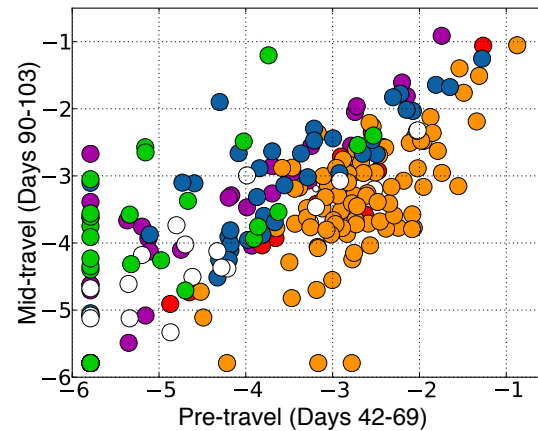

## D

State switch model

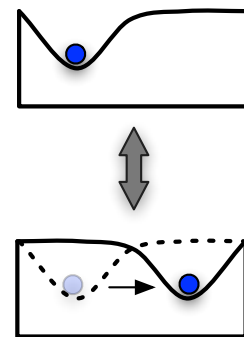

## F

Infection

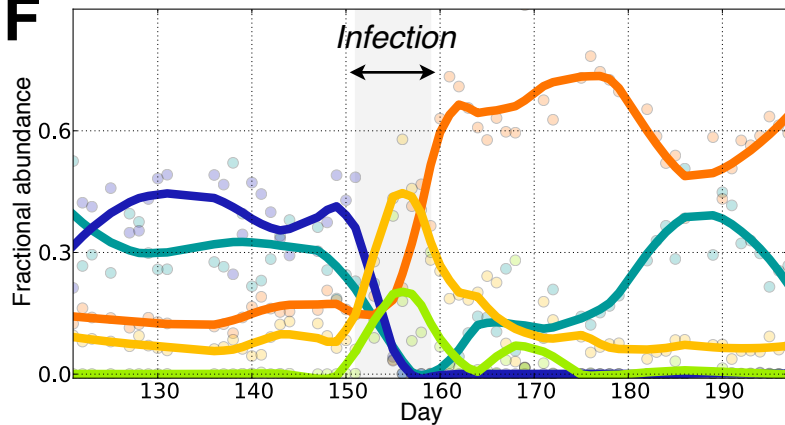

## G

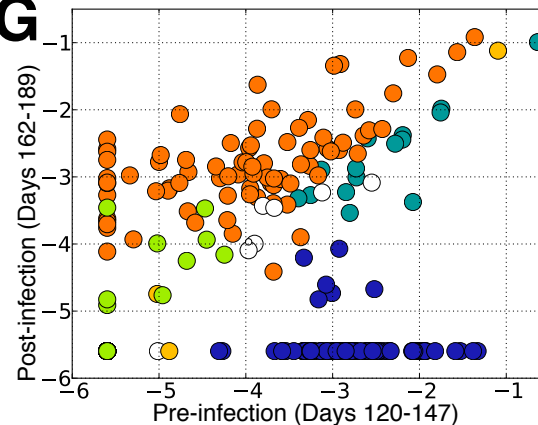

## H

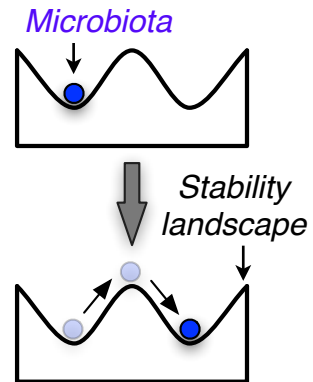

# Subject B
