# Supplementary figures and images for: Host lifestyle affects human microbiota on daily timescales
Source: Springer Nature journal article supplement (doi:10.1186/gb-2014-15-7-r89), 2014-07-25

**A** Subject A gut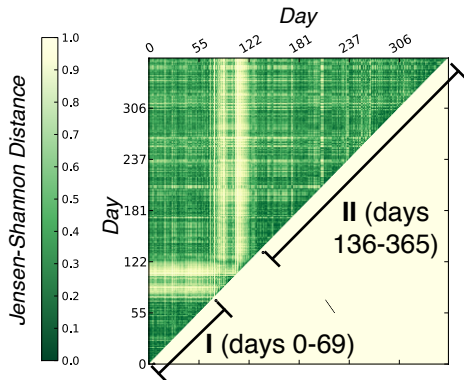**B** Subject B gut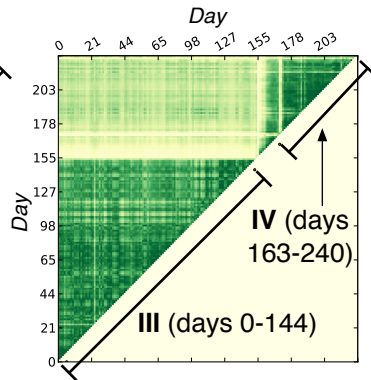**C** Subject A saliva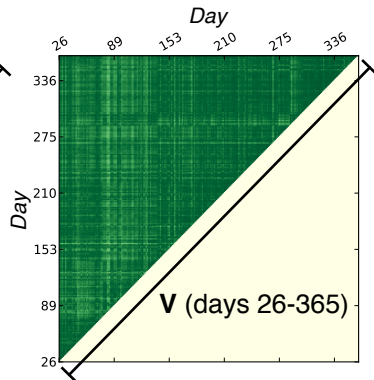**D**

Non-stationary taxa

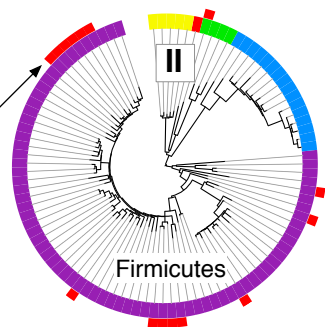**E**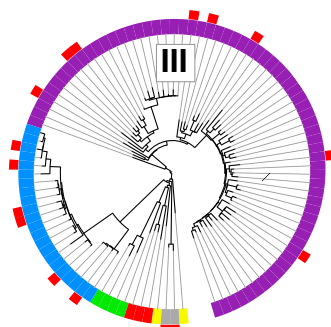**F**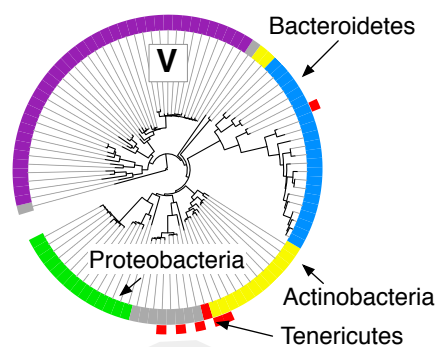**G**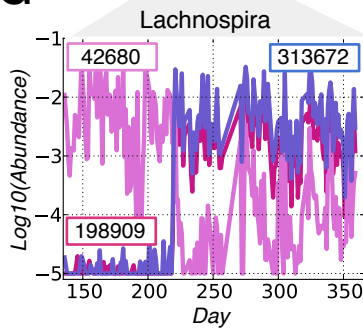**H**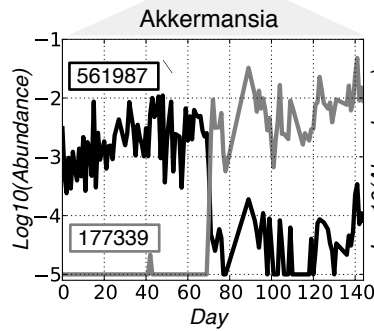**I**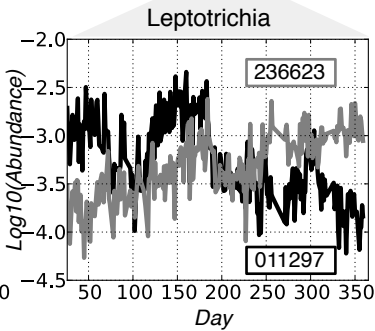

Supplement: 13059_2013_3286_MOESM20_ESM.pdf [file 13059_2013_3286_MOESM20_ESM.pdf]

Cluster 4

Cluster 7

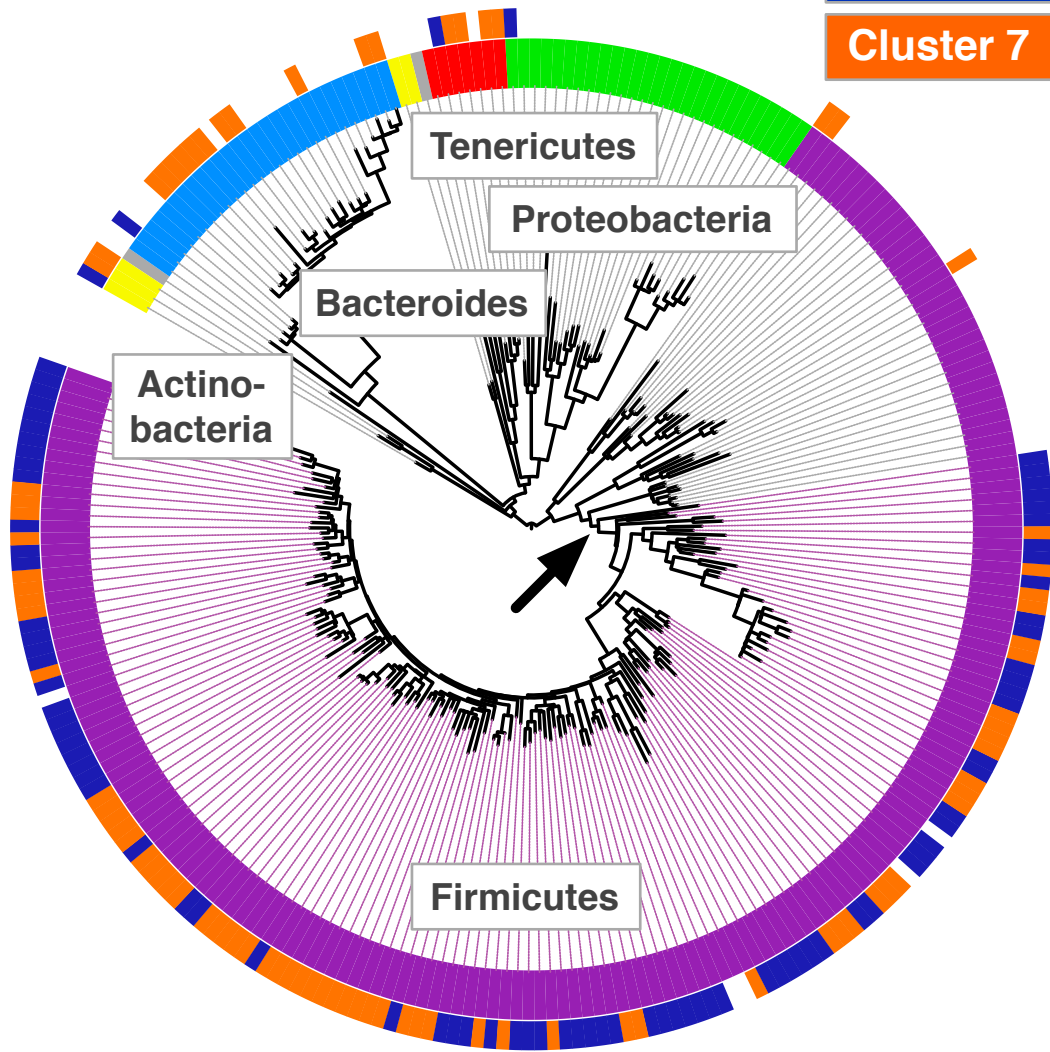

Tenericutes

Proteobacteria

Bacteroides

Actino-  
bacteria

Firmicutes

Supplement: 13059_2013_3286_MOESM22_ESM.pdf [file 13059_2013_3286_MOESM22_ESM.pdf]

**A**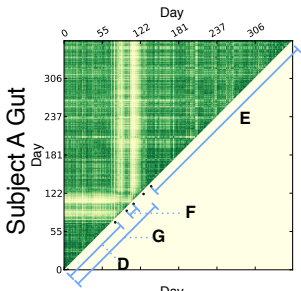**B**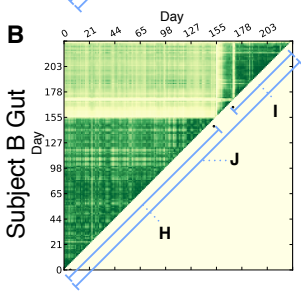**C**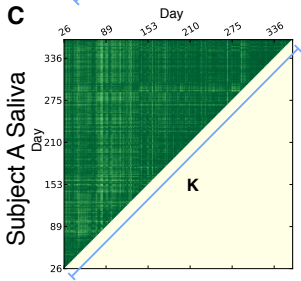**D**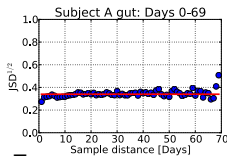**E**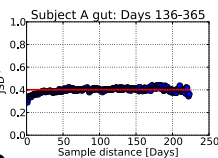**F**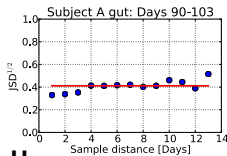**G**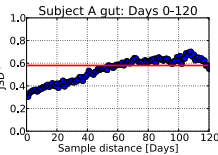**H**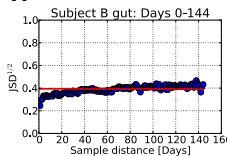**I**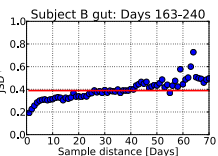**J**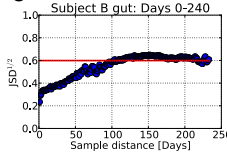**K**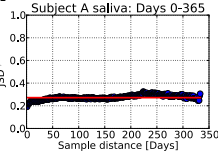

Supplement: 13059_2013_3286_MOESM3_ESM.pdf [file 13059_2013_3286_MOESM3_ESM.pdf]

# A Donor A Gut

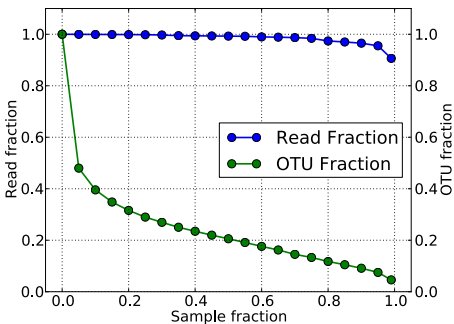

# B Donor B Gut

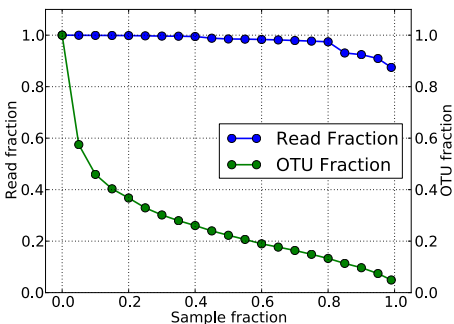

# C Donor A Saliva

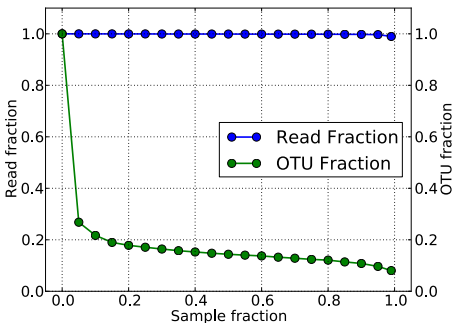

Supplement: 13059_2013_3286_MOESM4_ESM.pdf [file 13059_2013_3286_MOESM4_ESM.pdf]

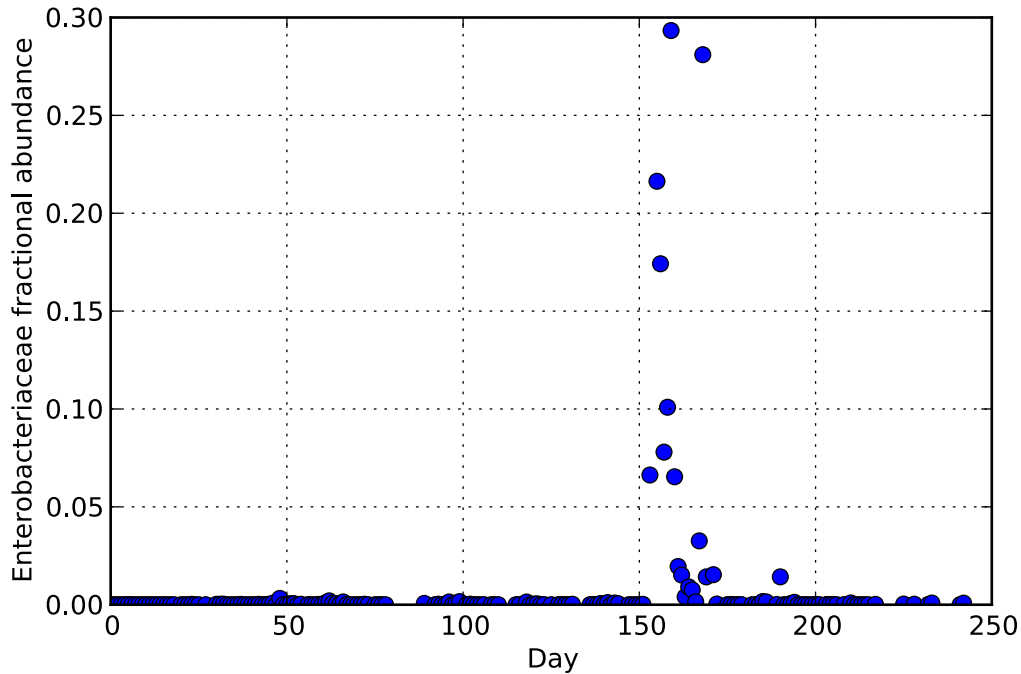

Supplement: 13059_2013_3286_MOESM5_ESM.pdf [file 13059_2013_3286_MOESM5_ESM.pdf]

Subject A gut Bacteroidetes/Firmicutes ratio over time

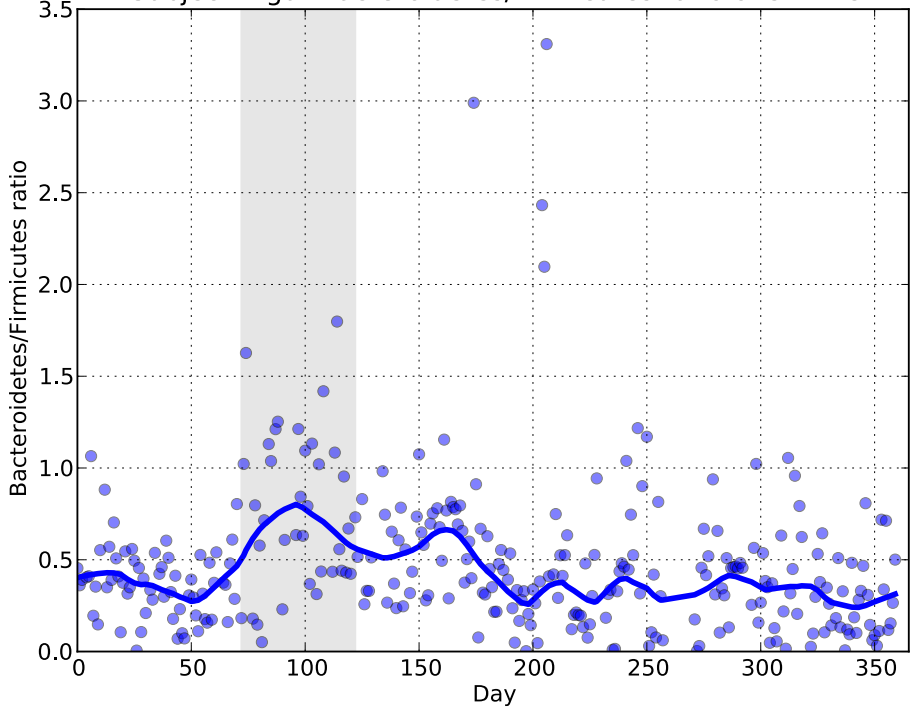

Supplement: 13059_2013_3286_MOESM6_ESM.pdf [file 13059_2013_3286_MOESM6_ESM.pdf]

# Subject A similarity to US samples

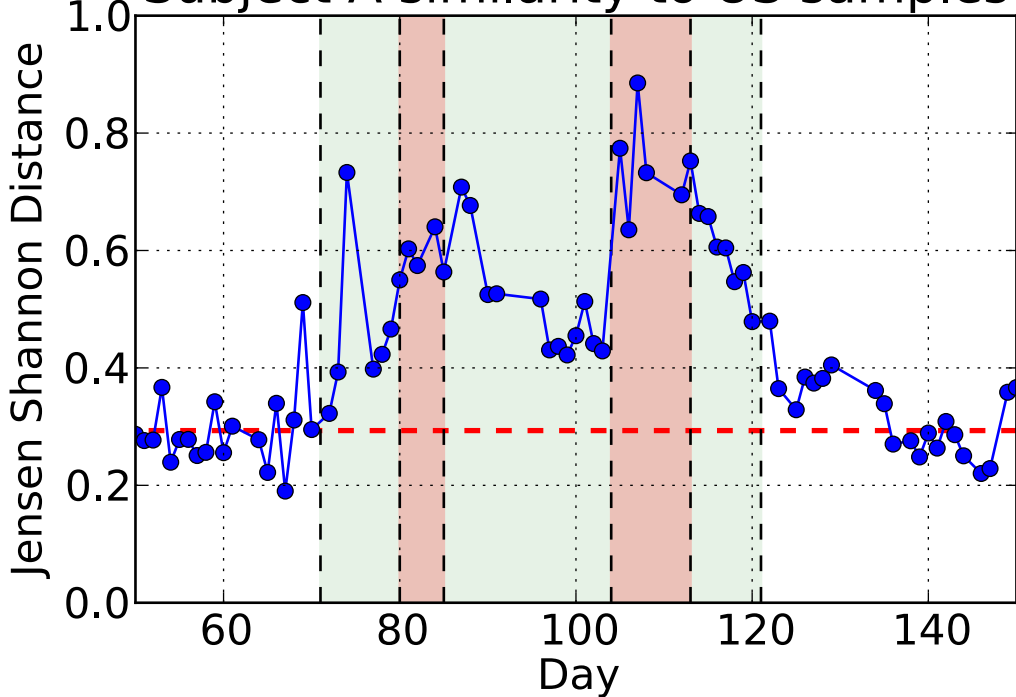

Supplement: 13059_2013_3286_MOESM7_ESM.pdf [file 13059_2013_3286_MOESM7_ESM.pdf]

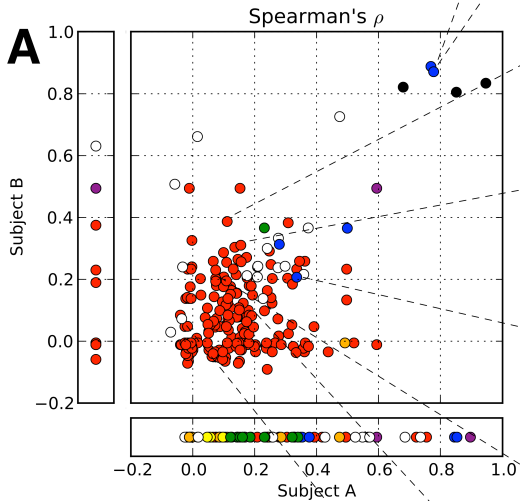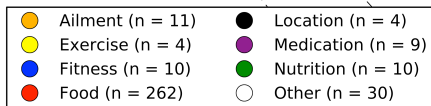

**B**

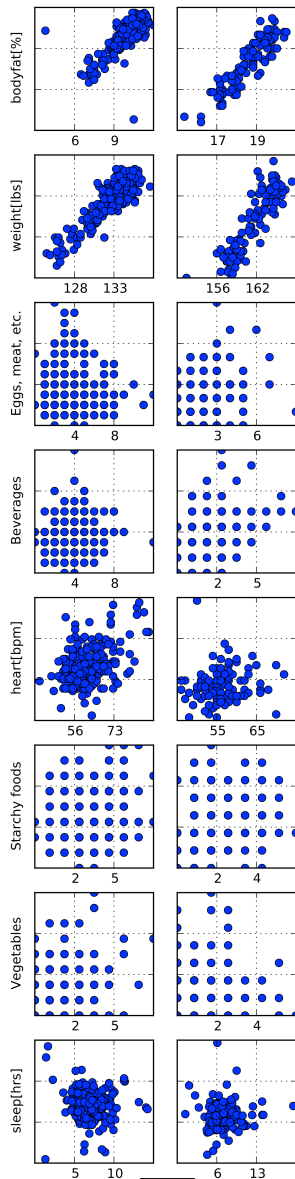

Supplement: 13059_2013_3286_MOESM8_ESM.pdf [file 13059_2013_3286_MOESM8_ESM.pdf]
